# Supplementary material for: Glucosamine-derived encapsulation of silicon nanoparticles for high-performance lithium ion batteries
Source: Royal Society of Chemistry journal article supplement (doi:10.1039/c4ta02199a), 2014-07-01
Supplement: c4ta02199a1.pdf [file c4ta02199a1.pdf]

## Electronic Supplementary Information (ESI)

### Glucosamine-Derived Encapsulation of Silicon Nanoparticles for High-Performance Lithium Ion Batteries

Hye-Won Kim,<sup>‡</sup> Dong Jin Lee,<sup>‡</sup> Hongkyung Lee, Jongchan Song,

Hee-Tak Kim\* and Jung-Ki Park\*

Department of Chemical and Biomolecular Engineering, Korea Advanced Institute of Science and  
Technology, 373-1, Guseong-dong, Yuseong-gu, Daejeon 305-701, Republic of Korea.

\* E-Mail: [heetak.kim@kaist.ac.kr](mailto:heetak.kim@kaist.ac.kr) (H.T. Kim), [jungpark@kaist.ac.kr](mailto:jungpark@kaist.ac.kr) (J.K. Park)

<sup>‡</sup> These authors contributed equally to this work.

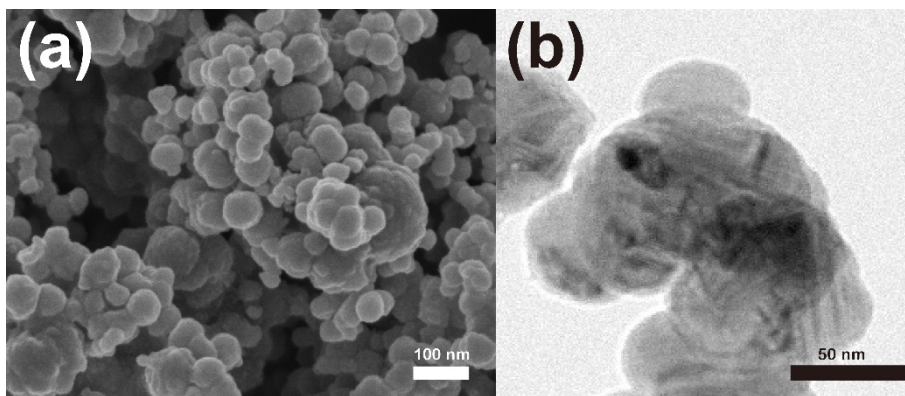

**Figure S1.** Images of the bare SiNPs (a) SEM, and (b) TEM

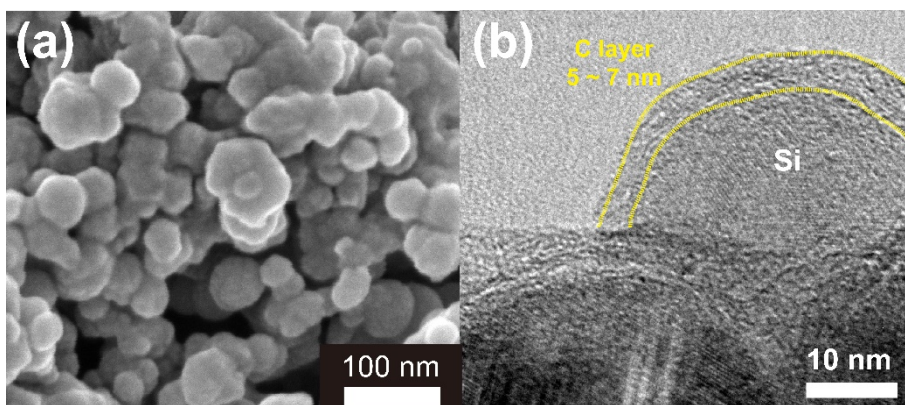

**Figure S2.** Images of the prepared C-Si (a) SEM, and (b) HRTEM

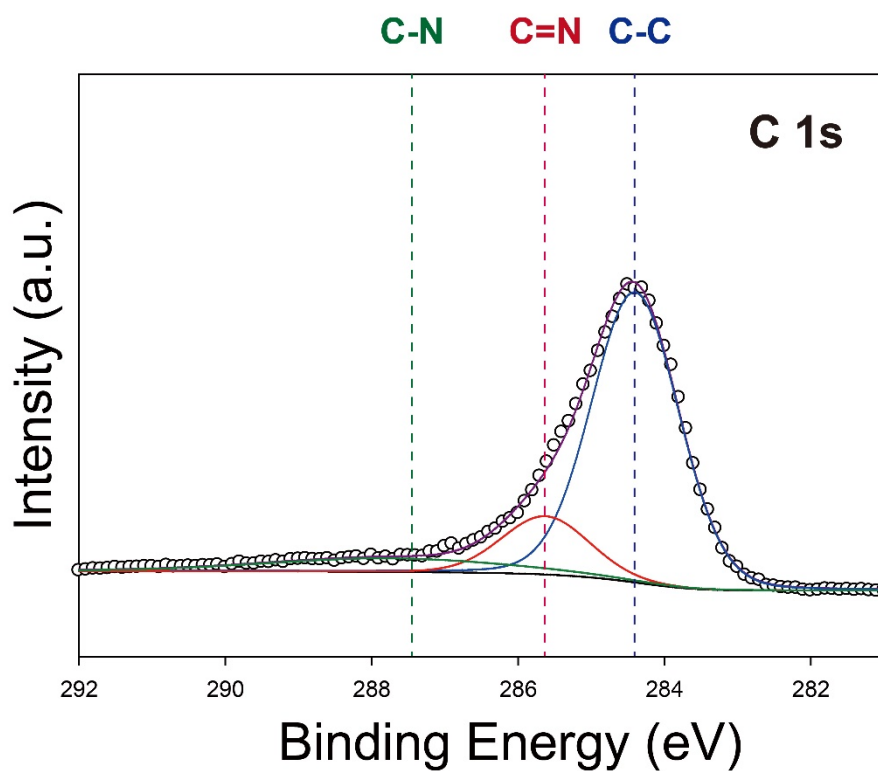

**Figure S3.** C 1s XPS spectrum of NC-Si.

|                 | Nitrogen    | Carbon       | Oxygen      |
|-----------------|-------------|--------------|-------------|
| <b>NC layer</b> | <b>7.8%</b> | <b>90.7%</b> | <b>1.5%</b> |
| <b>C layer</b>  | -           | <b>99.2%</b> | <b>0.8%</b> |

**Figure S4.** Elemental analysis of NC (for NC-Si) and C (for C-Si) layers of samples

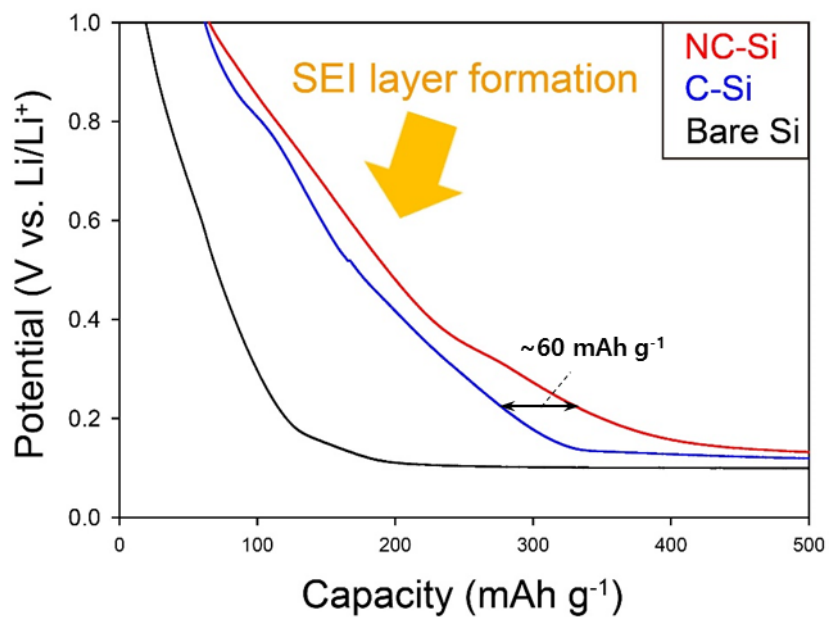

**Figure S5.** Profiles of potential in early stage, first lithiation (0.3 A g<sup>-1</sup>) for electrodes based on Si NPs, C-Si NPs, and NC-Si NPs. (This is a magnified image of Figure 2a.)

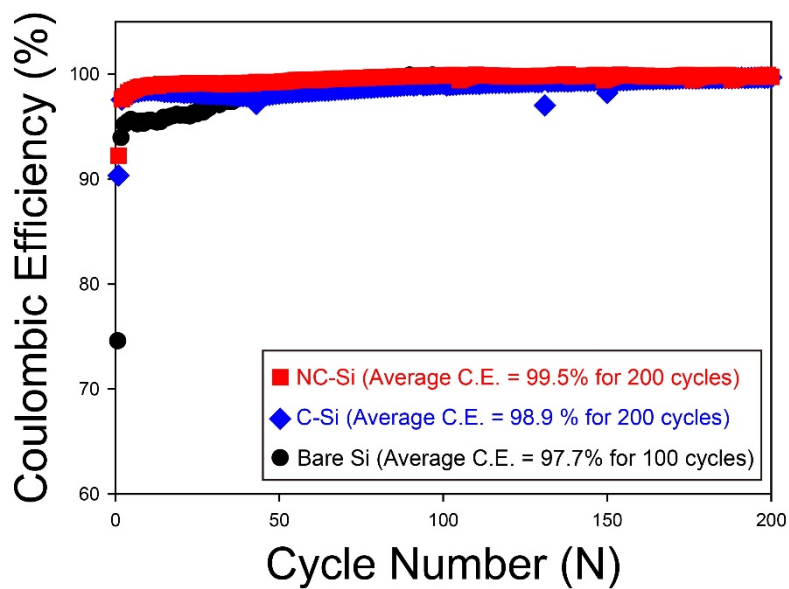

**Figure S6.** Coulombic efficiencies of unit cells fabricated using Si NPs, C-Si NPs, and NC-Si NPs, measured at 2A g<sup>-1</sup>
